# Supplementary material
Source: MDPI journal article supplement (https://www.mdpi.com/2072-4292/5/1/1)
Supplement: s1 [file s1]

Correction

**Correction: Shannon, A.M.; Power, H.E.; Webster, J.M.; Vila-Concejo, A. Evolution of Coral Rubble Deposits on a Reef Platform as Detected by Remote Sensing. *Remote Sensing*, 2013, 5, 1–18**

**Amelia M. Shannon, Hannah E. Power, Jody M. Webster and Ana Vila-Concejo \***

Geocoastal Research Group, School of Geosciences, University of Sydney, Sydney, NSW 2006, Australia; E-Mails: asha8429@uni.sydney.edu.au (A.M.S.); hannah.power@sydney.edu.au (H.E.P.); jody.webster@sydney.edu.au (J.M.W.)

\* Author to whom correspondence should be addressed; E-Mail: ana.vilaconcejo@sydney.edu.au; Tel.: +61-2-9351-5190; Fax: +61-2-9351-2442.

Received: 11 February 2014 / Accepted: 10 March 2014 / Published: 26 March 2014

---

Due to an oversight by the authors there are a few corrections that are necessary for the publication [1]:

Section 2, Study Area. In the part concerning wave climate in the study area (second to last paragraph on Page 3), we need to correct the data period and the reference. The latter should be Thornborough's thesis [2], which is reference 14 in the original paper [1]. The correct version reads: "An analysis of National Oceanic and Atmospheric Administration (NOAA) WAVEWATCH III (WW3) wave data, identified that between 2000 and 2009 the average wave climate of One Tree Reef was characterised by an average significant wave height ( $H_s$ ) of 1.54 m, peak wave period ( $T_p$ ) of 7.43 s, and a mean wave direction ( $\theta_m$ ) of 199.1 ° (lagoon-ward), corresponding to a mean wave power ( $P$ ) of 20.93 N m<sup>-1</sup> [14]."

Figure 1b,c (Page 4) is also modified from Thornborough's thesis [2], as such we would need to add the reference (reference number 14 in [1]). The correct caption for Figure 1 should therefore be:

**“Figure 1. (a)** Multispectral classified IKONOS 2001 satellite image of One Tree Reef. The Eastern Rubble Flat (RF) is separated into the Northern Section (Nth RF: green) and the Southern Section (Sth RF: orange). The positions of seven isolated rubble spits located around the lower energy margins of the reef (SP-1 to SP-7) are marked in black. **(b)** One Tree Reef is located 100 km from the Queensland coastline in the southern Great Barrier Reef, Australia.

(c) Windrose showing predominantly south easterly winds year-round. (b,c) are adapted from [14] with permission.”

Section 5, Discussion. In the last paragraph on Page 11 there is a sentence that reads “These spits may have originated during TC Hamish in March 2009 when rubble was deposited in several areas of the reef [34]”. The correct reference should be [3] which is reference 30 in [1], hence the correct version reads:

“These spits may have originated during TC Hamish in March 2009 when rubble was deposited in several areas of the reef [30]”.

On Page 14, in the last paragraph of the discussion, the reference number is incorrect. The sentence reads “Simultaneously, the elevation of the reef flat also increases from the south to the north [10]”, but should be:

“Simultaneously, the elevation of the reef flat also increases from the south to the north [14].”

## References and Notes

1. Shannon, A.M.; Power, H.E.; Webster, J.M.; Vila-Concejo, A. Evolution of coral rubble deposits on a reef platform as detected by remote sensing. *Remote Sens.* **2013**, *5*, 1–18.
2. Thornborough, K.J. Rubble-Dominated Reef Flat Processes and Development: Evidence from One Tree Reef, Southern Great Barrier Reef. Ph.D. Thesis, The University of Sydney, Sydney, NSW, Australia, 2012; p. 142.
3. Woolsey, E.; Bainbridge, S.; Kingsford, M.; Byrne, M. Impacts of cyclone Hamish at One Tree Reef: Integrating environmental and benthic habitat data. *Marine Biol.* **2012**, *159*, 793–803.

© 2014 by the authors; licensee MDPI, Basel, Switzerland. This article is an open access article distributed under the terms and conditions of the Creative Commons Attribution license (<http://creativecommons.org/licenses/by/3.0/>).
